# Supplementary material for: Synthesis of high rate capability N-doped carbon coated on lithium zinc titanate via a surfactant-assisted solid-state route
Source: Royal Society of Chemistry journal article supplement (doi:10.1039/c7ra10969e), 2017-01-01
Supplement: c7ra10969e1.pdf [file c7ra10969e1.pdf]

## Supplementary Information

### Synthesis of high rate capability N-doped carbon coated on lithium zinc titanate via a surfactant-assisted solid-state route

Zhaohui Meng<sup>a,1,\*\*</sup>, Song Wang<sup>a,1</sup>, Xinfeng Chen<sup>a</sup>, Lijuan Wang<sup>a,\*</sup>, Fei Wang<sup>b</sup>

<sup>a</sup> College of Chemistry and Pharmaceutical Engineering, Nanyang Normal University,  
Nanyang 473061, China

<sup>b</sup> School of Chemistry and Materials Science, Huaibei Normal University, Huaibei, Anhui  
235000, China

\*Corresponding author:

Mrs. Lijuan Wang

College of Chemistry and Pharmaceutical Engineering, Nanyang Normal University,  
Nanyang 473061, China

*E-mail address:* [lijuanw123@163.com](mailto:lijuanw123@163.com)

Tel.: +86-377-63513540; fax: +86-377-63168316.

<sup>1</sup> These authors contributed equally to this work.

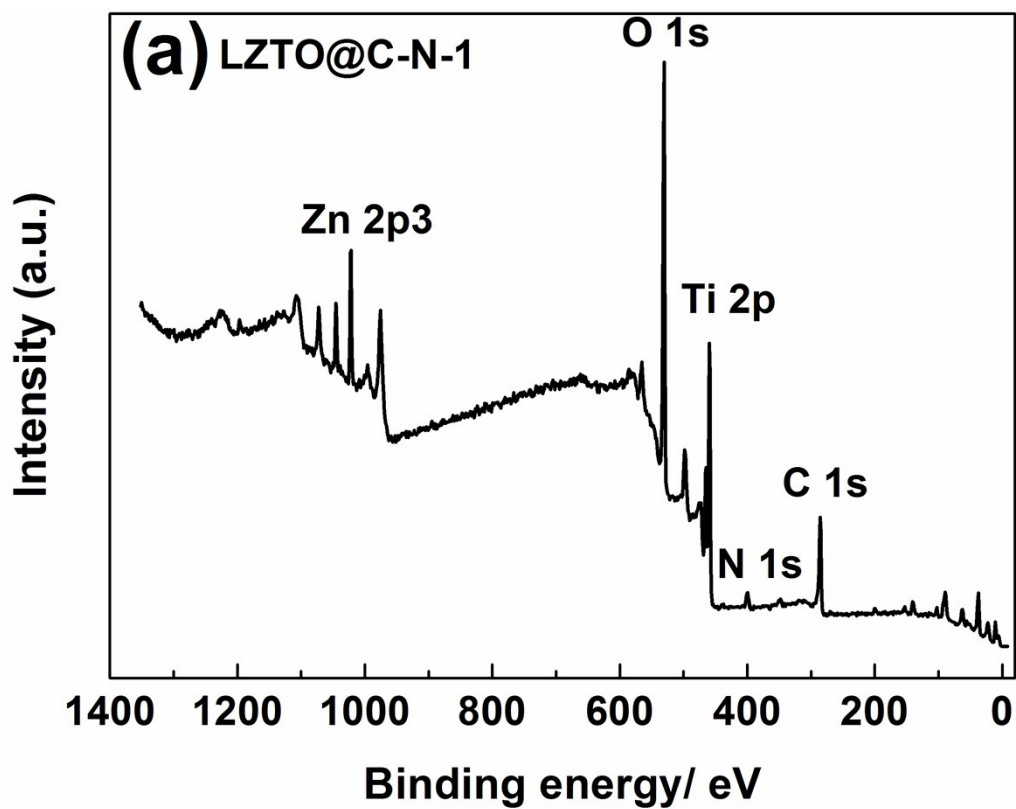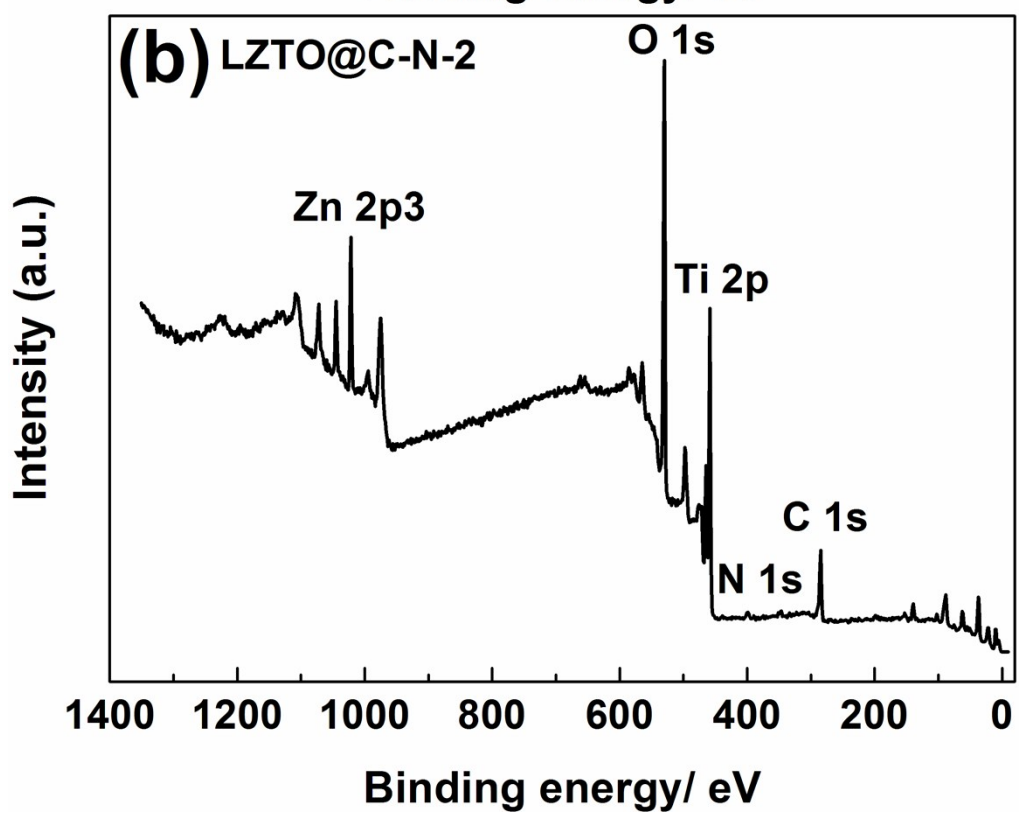

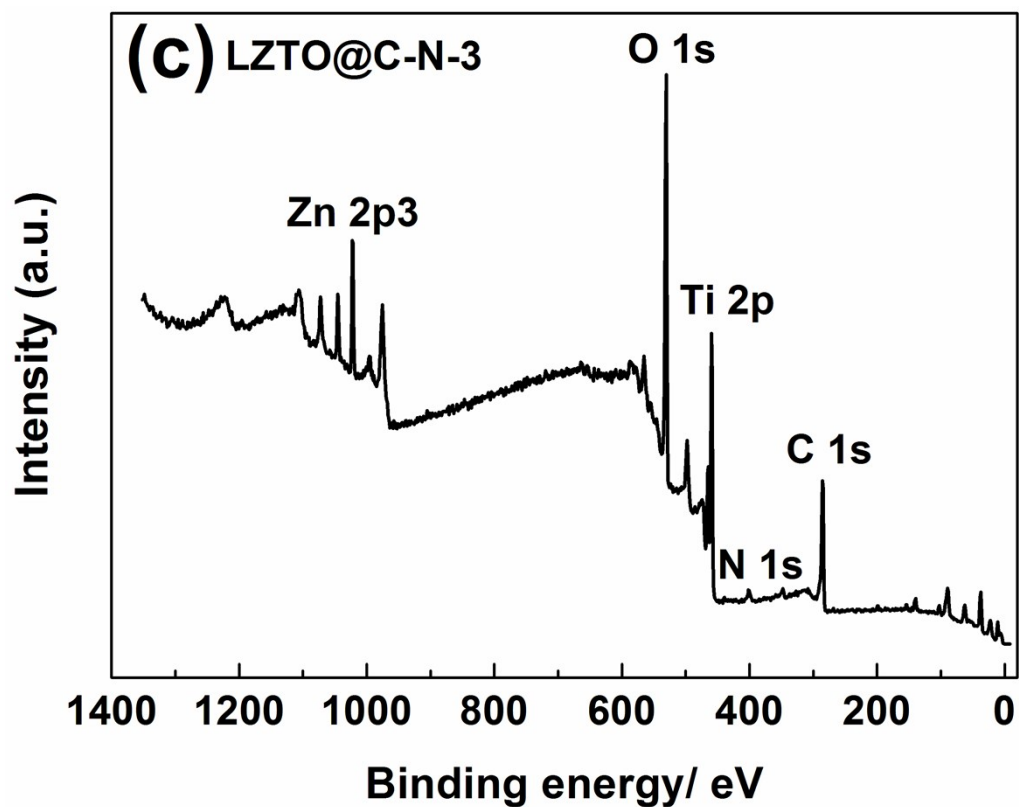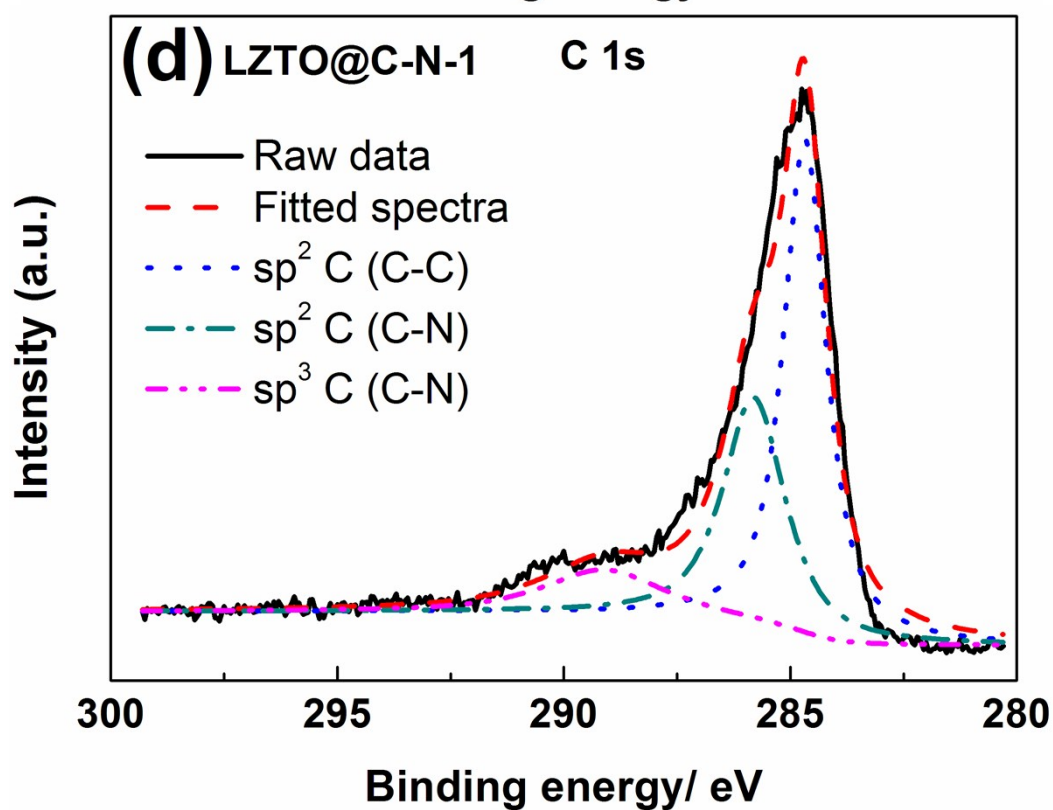

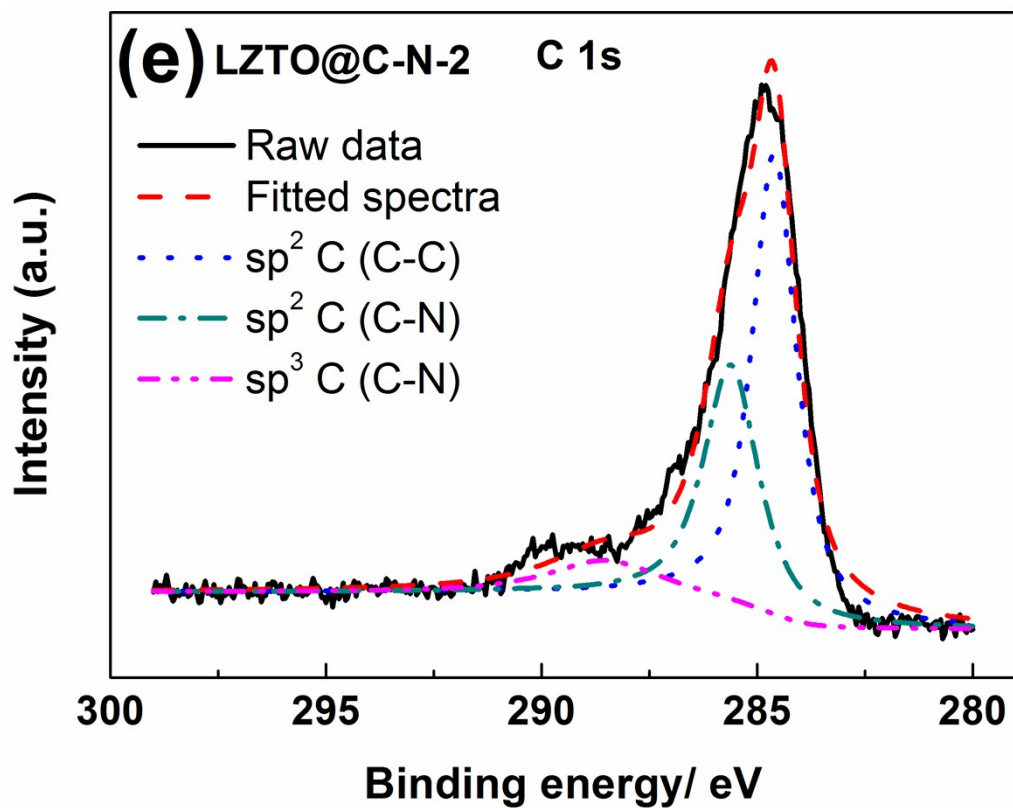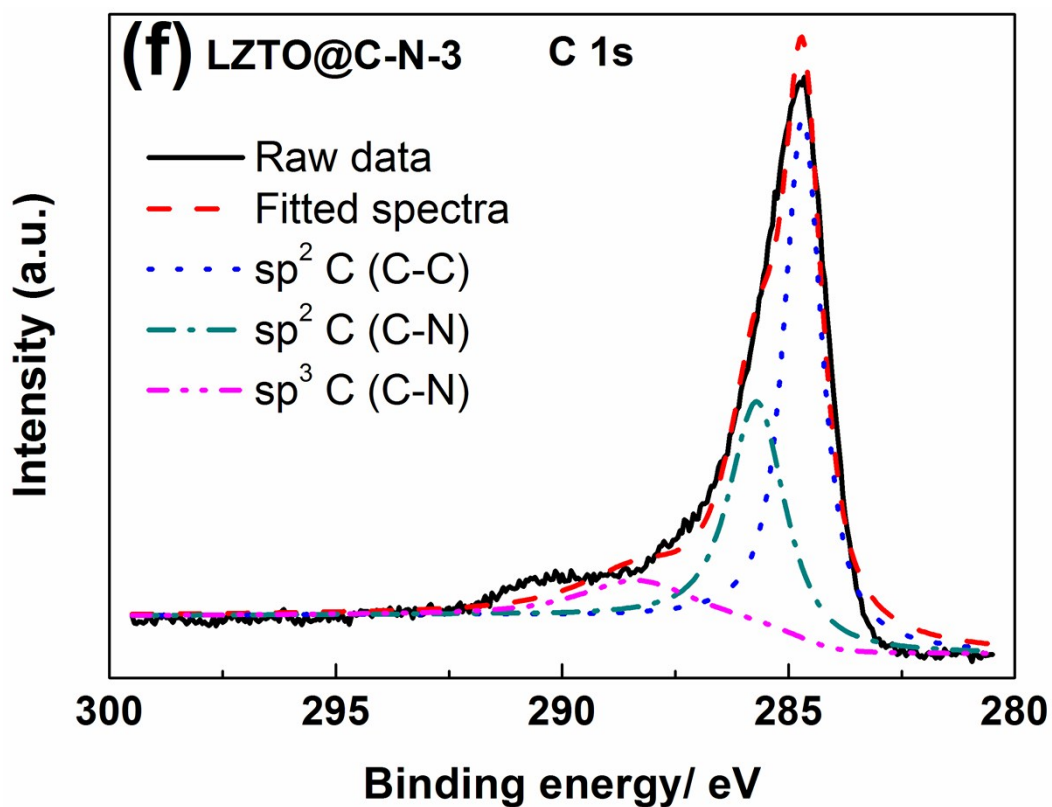

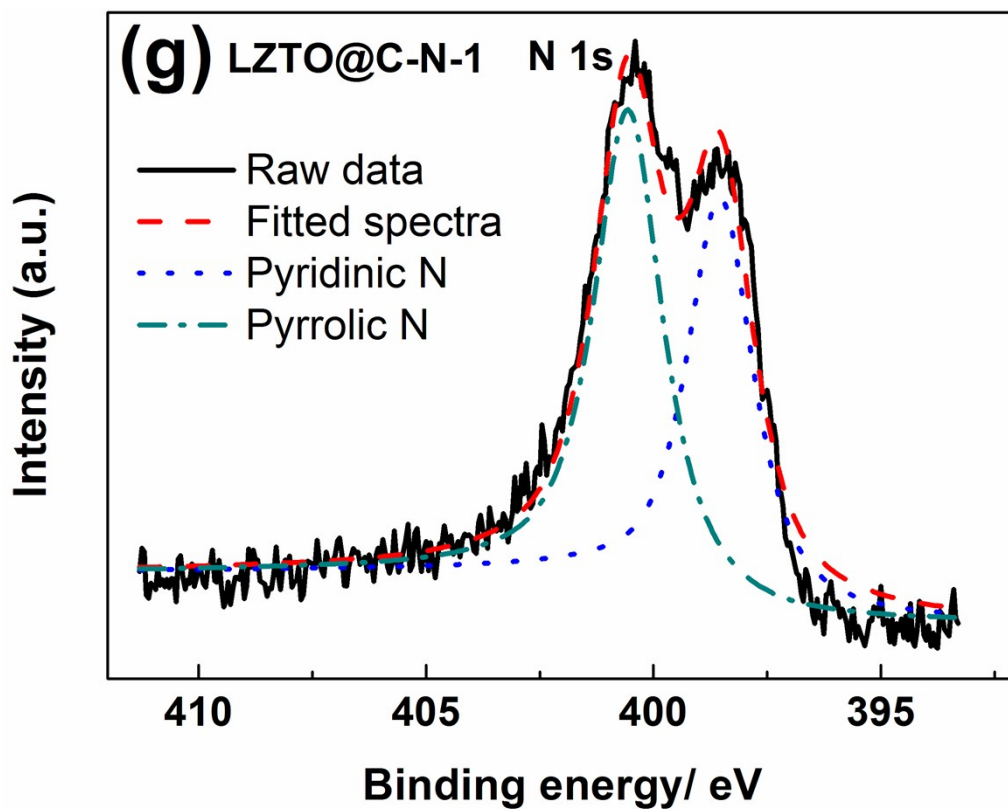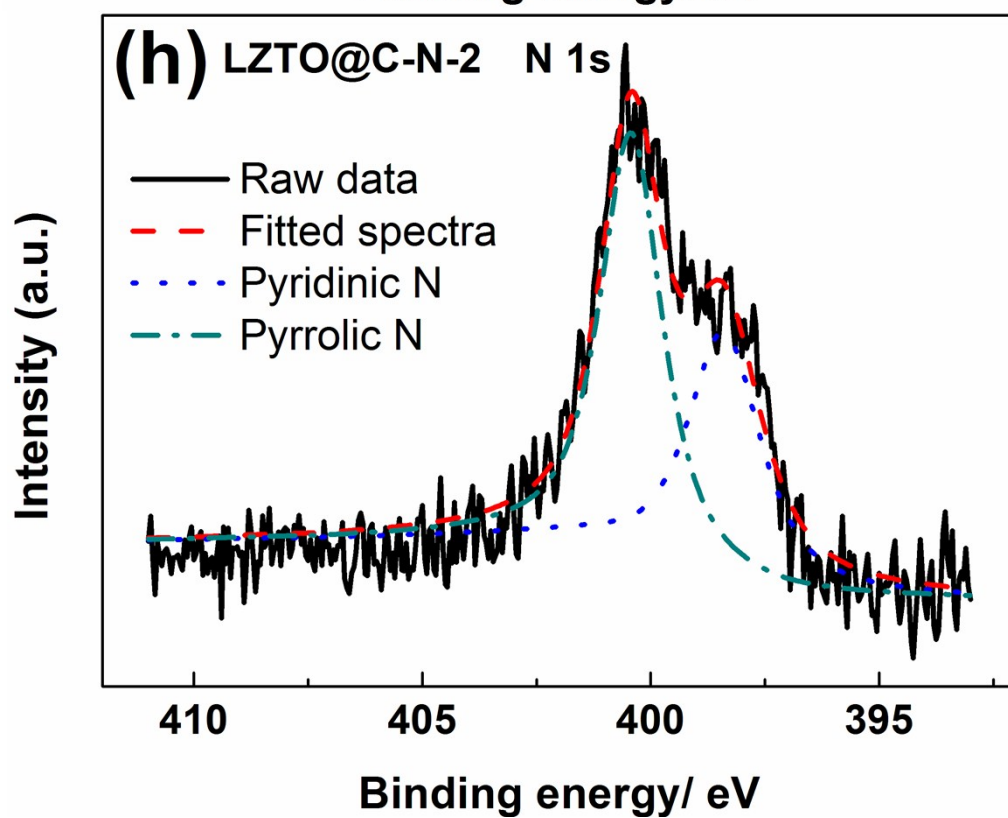

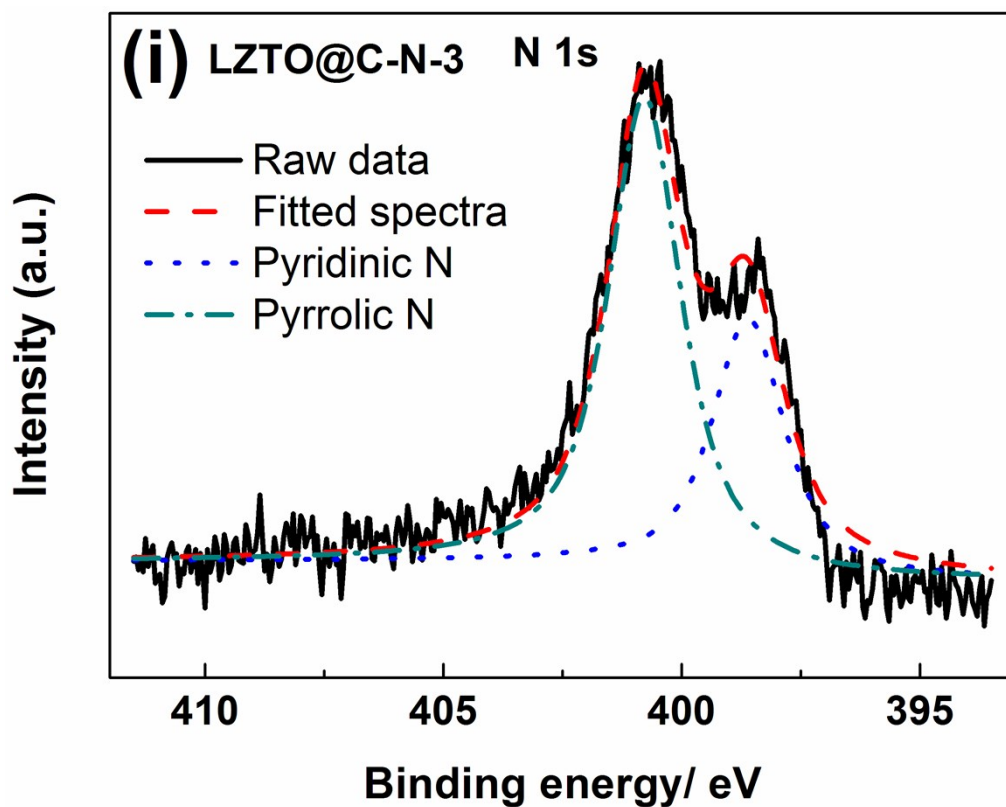

Fig. S1 XPS survey spectra of (a) LZTO@C-N-1, (b) LZTO@C-N-2 and (c) LZTO@C-N-3; High resolution C 1s XPS spectra of (d) LZTO@C-N-1, (e) LZTO@C-N-2 and (f) LZTO@C-N-3; high resolution N 1s XPS spectra of (g) LZTO@C-N-1, (h) LZTO@C-N-2 and (i) LZTO@C-N-3.
